# Supplementary material for: Comparative Mitochondrial Genomes between the Genera Amiota and Phortica (Diptera: Drosophilidae) with Evolutionary Insights into D-Loop Sequence Variability
Source: MDPI journal article supplement (doi:10.3390/genes14061240), 2023-06-09
Supplement: s1 [file s1]

## **Supplementary Data:**

### **Comparative mitochondrial genomes between the genera *Amiota* and *Phortica* (Diptera: Drosophilidae) with evolutionary insights into D-loop sequence variability**

#### **Contents:**

**Page 2: Table S1.** Sizes of the mitogenomes.

**Page 3: Table S2.** IGNs of the mitogenomes.

**Pages 4–5: Table S3.** RSCU values of the PCGs in the mitogenomes.

**Page 6: Table S4.** CDspT values of the PCGs in the mitogenomes.

**Pages 7–8: Table S5.** Nucleotide compositions and skewness levels of the mitogenomes.

**Page 9: Table S6.** Ka, Ks, and Ka/Ks values of the PCGs in the mitogenomes.

**Page 10: Table S7.** Partitioning schemes and data subsets evaluated for the phylogenetic analyses.

**Table S1.** Sizes of the *Amiota* and *Phortica* mitogenomes.

| Gene                     | <i>A. dentata</i> | <i>A. femorata</i> | <i>A. nagatai</i> | <i>A. setosa</i> | <i>A. spinifemorata</i> | <i>A. yifengi</i> | <i>P. (A.) longipenis</i> | <i>P. (A.) tanabei</i> | <i>P. (P.) huazhii</i> | <i>P. (P.) pseudogigas</i> | <i>P. (P.) variegata</i> | <i>P. (S.) hani</i> |
|--------------------------|-------------------|--------------------|-------------------|------------------|-------------------------|-------------------|---------------------------|------------------------|------------------------|----------------------------|--------------------------|---------------------|
| <i>trnI</i> (Ile)        | 64                | 65                 | 65                | 65               | 65                      | 67                | 65                        | 66                     | 65                     | 65                         | 65                       | 65                  |
| <i>trnQ</i> (Gln)        | 69                | 69                 | 69                | 69               | 69                      | 69                | 69                        | 69                     | 69                     | 69                         | 69                       | 69                  |
| <i>trnM</i> (Met)        | 69                | 69                 | 69                | 69               | 69                      | 69                | 69                        | 69                     | 69                     | 69                         | 69                       | 69                  |
| <i>ND2</i>               | 1,026             | 1,023              | 1,026             | 1,026            | 1,026                   | 1,023             | 1,026                     | 1,026                  | 1,026                  | 1,026                      | 1,026                    | 1,026               |
| <i>trnW</i> (Trp)        | 68                | 68                 | 68                | 68               | 68                      | 68                | 67                        | 67                     | 68                     | 68                         | 68                       | 67                  |
| <i>trnC</i> (Cys)        | 63                | 63                 | 64                | 63               | 63                      | 62                | 62                        | 62                     | 63                     | 63                         | 63                       | 62                  |
| <i>trnY</i> (Tyr)        | 65                | 66                 | 67                | 66               | 65                      | 65                | 68                        | 66                     | 66                     | 65                         | 66                       | 66                  |
| <i>COX1</i>              | 1,539             | 1,539              | 1,539             | 1,539            | 1,539                   | 1,539             | 1,539                     | 1,539                  | 1,539                  | 1,539                      | 1,539                    | 1,539               |
| <i>trnL1</i> (Leu) (UUR) | 66                | 66                 | 66                | 66               | 66                      | 66                | 66                        | 66                     | 66                     | 66                         | 66                       | 66                  |
| <i>COX2</i>              | 681               | 681                | 681               | 681              | 681                     | 681               | 685                       | 685                    | 685                    | 685                        | 685                      | 685                 |
| <i>trnK</i> (Lys)        | 71                | 71                 | 71                | 71               | 71                      | 71                | 71                        | 71                     | 71                     | 71                         | 71                       | 71                  |
| <i>trnD</i> (Asp)        | 70                | 70                 | 67                | 70               | 66                      | 70                | 67                        | 67                     | 66                     | 67                         | 67                       | 66                  |
| <i>ATP8</i>              | 162               | 162                | 162               | 162              | 162                     | 162               | 162                       | 162                    | 162                    | 162                        | 162                      | 162                 |
| <i>ATP6</i>              | 678               | 678                | 678               | 678              | 678                     | 678               | 678                       | 678                    | 678                    | 678                        | 678                      | 678                 |
| <i>COX3</i>              | 789               | 789                | 789               | 789              | 789                     | 789               | 789                       | 789                    | 789                    | 789                        | 789                      | 789                 |
| <i>trnG</i> (Gly)        | 64                | 64                 | 66                | 65               | 65                      | 64                | 64                        | 65                     | 65                     | 64                         | 65                       | 64                  |
| <i>ND3</i>               | 354               | 354                | 354               | 352              | 354                     | 354               | 354                       | 354                    | 354                    | 354                        | 354                      | 354                 |
| <i>trnA</i> (Ala)        | 65                | 67                 | 65                | 66               | 65                      | 65                | 66                        | 65                     | 65                     | 65                         | 65                       | 65                  |
| <i>trnR</i> (Arg)        | 64                | 64                 | 63                | 63               | 63                      | 63                | 64                        | 63                     | 63                     | 63                         | 63                       | 63                  |
| <i>trnN</i> (Asn)        | 69                | 65                 | 65                | 66               | 65                      | 65                | 66                        | 67                     | 65                     | 65                         | 65                       | 65                  |
| <i>trnS2</i> (Ser) (AGN) | 66                | 68                 | 67                | 66               | 68                      | 68                | 67                        | 67                     | 67                     | 65                         | 67                       | 67                  |
| <i>trnE</i> (Glu)        | 67                | 68                 | 67                | 66               | 67                      | 67                | 67                        | 67                     | 66                     | 66                         | 66                       | 66                  |
| <i>trnF</i> (Phe)        | 66                | 66                 | 66                | 68               | 66                      | 66                | 66                        | 66                     | 66                     | 67                         | 67                       | 66                  |
| <i>ND5</i>               | 1,717             | 1,720              | 1,720             | 1,717            | 1,720                   | 1,720             | 1,722                     | 1,722                  | 1,720                  | 1,720                      | 1,720                    | 1,720               |
| <i>trnH</i> (His)        | 65                | 65                 | 66                | 66               | 66                      | 66                | 66                        | 65                     | 66                     | 65                         | 65                       | 65                  |
| <i>ND4</i>               | 1,339             | 1,339              | 1,339             | 1,339            | 1,339                   | 1,339             | 1,339                     | 1,339                  | 1,339                  | 1,339                      | 1,339                    | 1,341               |
| <i>ND4L</i>              | 291               | 291                | 291               | 291              | 291                     | 291               | 291                       | 291                    | 291                    | 291                        | 291                      | 291                 |
| <i>trnT</i> (Thr)        | 64                | 65                 | 64                | 65               | 65                      | 65                | 65                        | 65                     | 65                     | 65                         | 65                       | 65                  |
| <i>trnP</i> (Pro)        | 67                | 66                 | 67                | 66               | 66                      | 66                | 66                        | 66                     | 68                     | 67                         | 66                       | 66                  |
| <i>ND6</i>               | 525               | 525                | 525               | 525              | 525                     | 525               | 525                       | 525                    | 525                    | 525                        | 525                      | 525                 |
| <i>CYTb</i>              | 1,137             | 1,137              | 1,137             | 1,137            | 1,137                   | 1,137             | 1,137                     | 1,137                  | 1,137                  | 1,137                      | 1,137                    | 1,137               |
| <i>trnS1</i> (Ser) (UCN) | 67                | 67                 | 67                | 68               | 67                      | 67                | 66                        | 67                     | 67                     | 67                         | 67                       | 67                  |
| <i>ND1</i>               | 937               | 937                | 937               | 916              | 937                     | 937               | 937                       | 937                    | 937                    | 937                        | 937                      | 937                 |
| <i>trnL2</i> (Leu) (CUN) | 65                | 66                 | 65                | 67               | 65                      | 67                | 63                        | 64                     | 63                     | 64                         | 64                       | 64                  |
| lrRNA                    | 1,329             | 1,327              | 1,330             | 1,322            | 1,338                   | 1,328             | 1,323                     | 1,318                  | 1,320                  | 1,322                      | 1,320                    | 1,317               |
| <i>trnV</i> (Val)        | 72                | 72                 | 72                | 72               | 72                      | 72                | 72                        | 72                     | 72                     | 72                         | 72                       | 72                  |
| srRNA                    | 787               | 784                | 789               | 785              | 787                     | 783               | 785                       | 784                    | 788                    | 787                        | 788                      | 787                 |
| D-loop region            | 1,912             | 1,672              | 1,554             | 1,995            | 1,319                   | 1,515             | 1,355                     | 1,084                  | 1,182                  | 1,158                      | 1,134                    | 1,118               |

**Table S2.** Intergenic nucleotides (IGNs) of the *Amiota* and *Phortica* mitogenomes.

| Gene                     | <i>A. dentata</i> | <i>A. femorata</i> | <i>A. nagatai</i> | <i>A. setosa</i> | <i>A. spinifemorata</i> | <i>A. yifengi</i> | <i>P. (A.) longipenis</i> | <i>P. (A.) tanabei</i> | <i>P. (P.) huazhii</i> | <i>P. (P.) pseudogigas</i> | <i>P. (P.) variegata</i> | <i>P. (S.) hani</i> |
|--------------------------|-------------------|--------------------|-------------------|------------------|-------------------------|-------------------|---------------------------|------------------------|------------------------|----------------------------|--------------------------|---------------------|
| <i>trnI</i> (Ile)        | 0                 | 7                  | 0                 | 1                | 1                       | 0                 | 100                       | 14                     | 15                     | 15                         | 15                       | 13                  |
| <i>trnQ</i> (Gln)        | −1                | −1                 | 5                 | −1               | −1                      | −1                | −1                        | −1                     | −1                     | −1                         | −1                       | −1                  |
| <i>trnM</i> (Met)        | 0                 | 0                  | 0                 | 0                | 0                       | 0                 | 0                         | 0                      | 0                      | 0                          | 0                        | 0                   |
| <i>ND2</i>               | 0                 | 0                  | 0                 | 0                | 0                       | 0                 | 0                         | 0                      | 0                      | 0                          | 0                        | 0                   |
| <i>trnW</i> (Trp)        | 6                 | 6                  | 38                | 6                | 6                       | 6                 | 6                         | 6                      | 6                      | 6                          | 6                        | 6                   |
| <i>trnC</i> (Cys)        | 2                 | 2                  | 47                | 0                | 2                       | 2                 | 1                         | 4                      | 2                      | 2                          | 2                        | 2                   |
| <i>trnY</i> (Tyr)        | 0                 | 0                  | 0                 | 0                | 0                       | 0                 | 0                         | 0                      | 0                      | 0                          | 0                        | 0                   |
| <i>COX1</i>              | 3                 | 3                  | 3                 | 3                | 3                       | 3                 | 3                         | 3                      | 3                      | 3                          | 3                        | 3                   |
| <i>trnL1</i> (Leu) (UUR) | 2                 | 3                  | 6                 | 3                | 4                       | 3                 | 2                         | 5                      | 2                      | 6                          | 2                        | 2                   |
| <i>COX2</i>              | 4                 | 7                  | 5                 | 6                | 6                       | 6                 | 3                         | 3                      | 3                      | 3                          | 3                        | 3                   |
| <i>trnK</i> (Lys)        | 1                 | −1                 | 0                 | −1               | 0                       | 2                 | 3                         | 0                      | 2                      | −1                         | 0                        | 0                   |
| <i>trnD</i> (Asp)        | 0                 | 0                  | 0                 | 0                | 1                       | 0                 | 0                         | 0                      | 0                      | 0                          | 0                        | 0                   |
| <i>ATP8</i>              | 5                 | 5                  | 5                 | 5                | 5                       | 5                 | 5                         | 5                      | 5                      | 5                          | 5                        | 5                   |
| <i>ATP6</i>              | −1                | −1                 | −1                | −1               | −1                      | −1                | −1                        | 5                      | 9                      | 12                         | 6                        | 11                  |
| <i>COX3</i>              | 8                 | 8                  | 11                | 8                | 8                       | 8                 | 9                         | 9                      | 9                      | 9                          | 9                        | 9                   |
| <i>trnG</i> (Gly)        | 0                 | 0                  | 0                 | 0                | 0                       | 0                 | 0                         | 0                      | 0                      | 0                          | 0                        | 0                   |
| <i>ND3</i>               | 0                 | 0                  | 3                 | 0                | 0                       | 0                 | 1                         | 2                      | 0                      | 0                          | 0                        | 0                   |
| <i>trnA</i> (Ala)        | 2                 | 8                  | 49                | 2                | 2                       | 3                 | −1                        | −1                     | −1                     | −1                         | −1                       | −1                  |
| <i>trnR</i> (Arg)        | 0                 | 3                  | 32                | 2                | 1                       | 1                 | 7                         | 9                      | 7                      | 2                          | 2                        | 3                   |
| <i>trnN</i> (Asn)        | 1                 | 0                  | 0                 | 1                | 0                       | 0                 | 0                         | 0                      | 0                      | 1                          | 0                        | 0                   |
| <i>trnS2</i> (Ser) (AGN) | 1                 | 0                  | 1                 | 1                | 0                       | 0                 | 0                         | 0                      | 0                      | 1                          | 0                        | 0                   |
| <i>trnE</i> (Glu)        | 18                | 18                 | 18                | 18               | 18                      | 18                | 18                        | 18                     | 19                     | 18                         | 18                       | 18                  |
| <i>trnF</i> (Phe)        | 0                 | 0                  | 0                 | 0                | 0                       | 0                 | 19                        | 9                      | 0                      | 0                          | 0                        | 0                   |
| <i>ND5</i>               | 15                | 15                 | 15                | 15               | 15                      | 15                | 15                        | 15                     | 15                     | 15                         | 15                       | 15                  |
| <i>trnH</i> (His)        | 0                 | 0                  | 0                 | 0                | 0                       | 0                 | 0                         | 0                      | 0                      | 0                          | 0                        | −1                  |
| <i>ND4</i>               | 4                 | 2                  | 6                 | 1                | 3                       | 4                 | −1                        | −1                     | −1                     | −1                         | 0                        | −1                  |
| <i>ND4L</i>              | 2                 | 2                  | 2                 | 2                | 2                       | 2                 | 2                         | 2                      | 2                      | 2                          | 2                        | 2                   |
| <i>trnT</i> (Thr)        | 0                 | 0                  | 0                 | 0                | 0                       | 0                 | 0                         | 0                      | 0                      | 0                          | 0                        | 0                   |
| <i>trnP</i> (Pro)        | 2                 | 3                  | 3                 | 2                | 2                       | 2                 | 2                         | 2                      | 2                      | 2                          | 2                        | 2                   |
| <i>ND6</i>               | −1                | −1                 | 6                 | −1               | −1                      | −1                | −1                        | −1                     | −1                     | −1                         | −1                       | −1                  |
| <i>CYTb</i>              | 0                 | 0                  | −1                | 0                | 0                       | 0                 | 0                         | 4                      | 0                      | 0                          | 0                        | 6                   |
| <i>trnS1</i> (Ser) (UCN) | 15                | 15                 | 15                | 15               | 15                      | 15                | 18                        | 18                     | 18                     | 18                         | 18                       | 10                  |
| <i>ND1</i>               | 10                | 10                 | 10                | 31               | 10                      | 10                | 10                        | 10                     | 10                     | 10                         | 10                       | 10                  |
| <i>trnL2</i> (Leu) (CUN) | 0                 | 0                  | 0                 | 0                | 0                       | 0                 | 0                         | 0                      | 0                      | 0                          | 0                        | 0                   |
| lrRNA                    | 0                 | 0                  | 0                 | 0                | 0                       | 0                 | 0                         | 0                      | 0                      | 0                          | 0                        | 0                   |
| <i>trnV</i> (Val)        | 0                 | 0                  | 0                 | 0                | 0                       | 0                 | 0                         | 0                      | 0                      | 0                          | 0                        | 0                   |
| srRNA                    | 0                 | 0                  | 0                 | 0                | 0                       | 0                 | 0                         | 0                      | 0                      | 0                          | 0                        | 0                   |
| D-loop region            | 0                 | 0                  | 0                 | 0                | 0                       | 0                 | 0                         | 0                      | 0                      | 0                          | 0                        | 0                   |

**Table S3.** Relative synonymous codon usage (RSCU) values of the protein-coding genes (PCGs) in the *Amiota* and *Phortica* mitogenomes.

| Amino acid | Codon | <i>A. dentata</i> | <i>A. femorata</i> | <i>A. nagatai</i> | <i>A. setosa</i> | <i>A. spinifemorata</i> | <i>A. yifengi</i> | <i>P. (A.) longipenis</i> | <i>P. (A.) tanabei</i> | <i>P. (P.) huazhii</i> | <i>P. (P.) pseudogigas</i> | <i>P. (P.) variegata</i> | <i>P. (S.) hani</i> |
|------------|-------|-------------------|--------------------|-------------------|------------------|-------------------------|-------------------|---------------------------|------------------------|------------------------|----------------------------|--------------------------|---------------------|
| Ala        | GCA   | 1.13              | 1.53               | 1.61              | 1.46             | 1.19                    | 1.27              | 1.48                      | 1.30                   | 1.25                   | 1.30                       | 1.06                     | 1.16                |
|            | GCU   | 2.44              | 2.40               | 2.34              | 2.17             | 2.53                    | 2.47              | 2.29                      | 2.47                   | 2.45                   | 2.38                       | 2.58                     | 2.61                |
|            | GCG   | 0.05              | 0.05               | 0.00              | 0.10             | 0.10                    | 0.03              | 0.02                      | 0.05                   | 0.07                   | 0.07                       | 0.04                     | 0.05                |
|            | GCC   | 0.38              | 0.02               | 0.05              | 0.27             | 0.17                    | 0.23              | 0.21                      | 0.18                   | 0.23                   | 0.25                       | 0.31                     | 0.18                |
| Arg        | CGA   | 2.51              | 2.85               | 2.58              | 2.69             | 2.85                    | 2.71              | 2.78                      | 2.98                   | 2.71                   | 2.71                       | 2.78                     | 2.78                |
|            | CGU   | 1.22              | 0.81               | 1.36              | 1.24             | 0.95                    | 0.95              | 1.08                      | 0.95                   | 0.95                   | 1.15                       | 1.02                     | 1.08                |
|            | CGG   | 0.14              | 0.27               | 0.07              | 0.07             | 0.20                    | 0.14              | 0.14                      | 0.07                   | 0.34                   | 0.14                       | 0.20                     | 0.14                |
|            | CGC   | 0.14              | 0.07               | 0.00              | 0.00             | 0.00                    | 0.20              | 0.00                      | 0.00                   | 0.00                   | 0.00                       | 0.00                     | 0.00                |
| Asn        | AAU   | 1.97              | 1.90               | 1.88              | 1.90             | 1.88                    | 1.89              | 1.84                      | 1.94                   | 1.71                   | 1.82                       | 1.81                     | 1.85                |
|            | AAC   | 0.10              | 0.10               | 0.13              | 0.10             | 0.12                    | 0.11              | 0.16                      | 0.06                   | 0.29                   | 0.18                       | 0.19                     | 0.15                |
| Asp        | GAU   | 1.77              | 1.84               | 1.78              | 1.85             | 1.81                    | 1.81              | 1.70                      | 1.82                   | 1.42                   | 1.55                       | 1.55                     | 1.76                |
|            | GAC   | 0.23              | 0.16               | 0.22              | 0.15             | 0.19                    | 0.19              | 0.30                      | 0.18                   | 0.58                   | 0.45                       | 0.45                     | 0.24                |
| Cys        | UGU   | 1.95              | 2.00               | 2.00              | 1.95             | 1.94                    | 1.95              | 1.90                      | 1.90                   | 1.95                   | 2.00                       | 1.90                     | 1.74                |
|            | UGC   | 0.05              | 0.00               | 0.00              | 0.05             | 0.06                    | 0.05              | 0.10                      | 0.10                   | 0.05                   | 0.00                       | 0.10                     | 0.26                |
| Gln        | CAA   | 1.83              | 1.97               | 1.94              | 1.81             | 1.94                    | 1.88              | 1.97                      | 1.89                   | 1.86                   | 1.86                       | 1.94                     | 1.86                |
|            | CAG   | 0.17              | 0.03               | 0.06              | 0.19             | 0.06                    | 0.12              | 0.03                      | 0.11                   | 0.14                   | 0.14                       | 0.06                     | 0.14                |
| Glu        | GAA   | 1.88              | 1.85               | 1.90              | 1.84             | 1.90                    | 1.95              | 1.87                      | 1.97                   | 1.84                   | 1.82                       | 1.89                     | 1.95                |
|            | GAG   | 0.12              | 0.15               | 0.10              | 0.16             | 0.10                    | 0.05              | 0.13                      | 0.03                   | 0.16                   | 0.18                       | 0.11                     | 0.05                |
|            | GGA   | 2.66              | 2.67               | 2.64              | 2.42             | 2.52                    | 2.70              | 2.72                      | 2.76                   | 2.70                   | 2.73                       | 2.61                     | 2.67                |
| Gly        | GGU   | 0.83              | 1.00               | 1.10              | 1.19             | 1.10                    | 0.97              | 1.00                      | 1.04                   | 0.68                   | 0.94                       | 0.97                     | 1.03                |
|            | GGG   | 0.44              | 0.29               | 0.20              | 0.29             | 0.29                    | 0.22              | 0.24                      | 0.19                   | 0.57                   | 0.29                       | 0.38                     | 0.28                |
|            | GGC   | 0.07              | 0.04               | 0.05              | 0.09             | 0.09                    | 0.11              | 0.04                      | 0.02                   | 0.06                   | 0.04                       | 0.04                     | 0.02                |
| His        | CAU   | 1.48              | 1.71               | 1.82              | 1.50             | 1.76                    | 1.70              | 1.61                      | 1.79                   | 1.37                   | 1.45                       | 1.47                     | 1.63                |
|            | CAC   | 0.52              | 0.29               | 0.18              | 0.50             | 0.24                    | 0.30              | 0.39                      | 0.21                   | 0.63                   | 0.55                       | 0.53                     | 0.37                |
| Ile        | AUU   | 1.95              | 1.95               | 1.97              | 1.90             | 1.92                    | 1.91              | 1.96                      | 1.94                   | 1.84                   | 1.85                       | 1.89                     | 1.95                |
|            | AUC   | 0.05              | 0.05               | 0.03              | 0.10             | 0.08                    | 0.09              | 0.04                      | 0.06                   | 0.16                   | 0.15                       | 0.11                     | 0.05                |
| Leu1       | UUA   | 5.02              | 5.21               | 5.32              | 4.94             | 5.19                    | 5.33              | 5.08                      | 5.20                   | 4.75                   | 4.77                       | 4.83                     | 5.09                |
|            | UUG   | 0.40              | 0.25               | 0.15              | 0.31             | 0.27                    | 0.23              | 0.27                      | 0.29                   | 0.36                   | 0.40                       | 0.26                     | 0.19                |
|            | CUA   | 0.27              | 0.22               | 0.19              | 0.45             | 0.22                    | 0.20              | 0.22                      | 0.16                   | 0.39                   | 0.26                       | 0.40                     | 0.25                |
| Leu2       | CUU   | 0.29              | 0.30               | 0.33              | 0.25             | 0.28                    | 0.22              | 0.42                      | 0.32                   | 0.48                   | 0.53                       | 0.47                     | 0.43                |
|            | CUG   | 0.00              | 0.01               | 0.01              | 0.01             | 0.01                    | 0.02              | 0.00                      | 0.03                   | 0.02                   | 0.01                       | 0.02                     | 0.02                |
|            | CUC   | 0.02              | 0.00               | 0.00              | 0.04             | 0.03                    | 0.01              | 0.00                      | 0.00                   | 0.00                   | 0.03                       | 0.02                     | 0.02                |
| Lys        | AAA   | 1.88              | 1.86               | 1.78              | 1.75             | 1.89                    | 1.83              | 1.89                      | 1.87                   | 1.61                   | 1.60                       | 1.73                     | 1.57                |
|            | AAG   | 0.12              | 0.14               | 0.22              | 0.25             | 0.11                    | 0.17              | 0.11                      | 0.13                   | 0.39                   | 0.40                       | 0.27                     | 0.43                |
| Met        | AUA   | 1.79              | 1.89               | 1.84              | 1.84             | 1.81                    | 1.85              | 1.85                      | 1.84                   | 1.84                   | 1.76                       | 1.77                     | 1.81                |
|            | AUG   | 0.21              | 0.11               | 0.16              | 0.16             | 0.19                    | 0.15              | 0.15                      | 0.16                   | 0.16                   | 0.24                       | 0.23                     | 0.19                |
| Phe        | UUU   | 1.92              | 1.89               | 1.94              | 1.90             | 1.95                    | 1.92              | 1.88                      | 1.91                   | 1.82                   | 1.88                       | 1.82                     | 1.83                |
|            | UUC   | 0.08              | 0.11               | 0.06              | 0.10             | 0.05                    | 0.08              | 0.12                      | 0.09                   | 0.18                   | 0.12                       | 0.18                     | 0.17                |
| Pro        | CCA   | 1.15              | 1.13               | 1.48              | 1.10             | 0.95                    | 1.27              | 0.71                      | 0.86                   | 1.13                   | 0.89                       | 1.04                     | 0.85                |
|            | CCU   | 2.51              | 2.69               | 2.49              | 2.41             | 2.74                    | 2.45              | 3.01                      | 2.80                   | 2.50                   | 2.75                       | 2.66                     | 2.78                |
|            | CCG   | 0.09              | 0.03               | 0.00              | 0.00             | 0.12                    | 0.00              | 0.00                      | 0.09                   | 0.15                   | 0.12                       | 0.06                     | 0.09                |
|            | CCC   | 0.25              | 0.15               | 0.03              | 0.49             | 0.18                    | 0.28              | 0.28                      | 0.25                   | 0.21                   | 0.24                       | 0.24                     | 0.27                |

|      |     |      |      |      |      |      |      |      |      |      |      |      |      |
|------|-----|------|------|------|------|------|------|------|------|------|------|------|------|
| Ser1 | UCA | 2.57 | 2.12 | 2.35 | 2.04 | 2.37 | 2.37 | 2.00 | 2.12 | 2.20 | 2.48 | 2.28 | 2.26 |
|      | UCU | 2.83 | 3.30 | 3.10 | 3.20 | 3.00 | 2.99 | 3.20 | 3.13 | 2.85 | 2.79 | 2.96 | 3.04 |
|      | UCG | 0.09 | 0.02 | 0.05 | 0.09 | 0.07 | 0.12 | 0.07 | 0.07 | 0.23 | 0.14 | 0.07 | 0.12 |
|      | UCC | 0.09 | 0.09 | 0.05 | 0.26 | 0.16 | 0.22 | 0.05 | 0.02 | 0.12 | 0.07 | 0.09 | 0.02 |
| Ser2 | AGA | 1.64 | 1.53 | 1.65 | 1.56 | 1.58 | 1.60 | 1.51 | 1.48 | 1.45 | 1.48 | 1.53 | 1.41 |
|      | AGU | 0.63 | 0.88 | 0.75 | 0.76 | 0.77 | 0.65 | 1.13 | 1.08 | 0.98 | 0.93 | 1.04 | 1.15 |
|      | AGG | 0.00 | 0.00 | 0.00 | 0.00 | 0.00 | 0.00 | 0.00 | 0.00 | 0.00 | 0.00 | 0.00 | 0.00 |
|      | AGC | 0.14 | 0.05 | 0.05 | 0.09 | 0.05 | 0.05 | 0.05 | 0.09 | 0.16 | 0.12 | 0.02 | 0.00 |
| Thr  | ACA | 1.95 | 1.97 | 2.02 | 1.58 | 1.96 | 1.72 | 1.72 | 1.58 | 1.74 | 1.70 | 1.76 | 1.86 |
|      | ACU | 1.77 | 1.94 | 1.93 | 2.09 | 1.94 | 2.15 | 2.17 | 2.20 | 2.07 | 2.06 | 2.04 | 1.97 |
|      | ACG | 0.02 | 0.04 | 0.02 | 0.09 | 0.00 | 0.09 | 0.04 | 0.07 | 0.04 | 0.15 | 0.07 | 0.02 |
|      | ACC | 0.26 | 0.04 | 0.02 | 0.24 | 0.09 | 0.04 | 0.07 | 0.15 | 0.17 | 0.09 | 0.13 | 0.15 |
| Trp  | UGA | 1.92 | 1.96 | 1.96 | 1.88 | 1.86 | 1.92 | 1.94 | 1.96 | 1.96 | 1.96 | 1.98 | 1.94 |
|      | UGG | 0.08 | 0.04 | 0.04 | 0.12 | 0.14 | 0.08 | 0.06 | 0.04 | 0.04 | 0.04 | 0.02 | 0.06 |
| Tyr  | UAU | 1.85 | 1.89 | 1.95 | 1.87 | 1.83 | 1.81 | 1.87 | 1.84 | 1.64 | 1.66 | 1.63 | 1.72 |
|      | UAC | 0.15 | 0.11 | 0.05 | 0.13 | 0.17 | 0.19 | 0.13 | 0.16 | 0.36 | 0.34 | 0.37 | 0.28 |
| Val  | GUA | 1.57 | 1.71 | 1.76 | 2.01 | 1.79 | 1.47 | 1.66 | 1.73 | 1.94 | 1.99 | 1.74 | 2.01 |
|      | GUU | 2.24 | 2.13 | 2.17 | 1.82 | 2.07 | 2.31 | 2.10 | 2.01 | 1.72 | 1.88 | 2.11 | 1.87 |
|      | GUG | 0.17 | 0.11 | 0.02 | 0.09 | 0.07 | 0.14 | 0.17 | 0.20 | 0.20 | 0.09 | 0.12 | 0.12 |
|      | GUC | 0.02 | 0.05 | 0.04 | 0.07 | 0.07 | 0.07 | 0.06 | 0.07 | 0.14 | 0.04 | 0.04 | 0.00 |

**Table S4.** Codons per thousand codon (CDspT) values of the PCGs in the *Amiota* and *Phortica* mitogenomes.

| Amino acid | <i>A. dentata</i> | <i>A. femorata</i> | <i>A. nagatai</i> | <i>A. setosa</i> | <i>A. spinifemorata</i> | <i>A. yifengi</i> | <i>P. (A.) longipenis</i> | <i>P. (A.) tanabei</i> | <i>P. (P.) huazhii</i> | <i>P. (P.) pseudogigas</i> | <i>P. (P.) variegata</i> | <i>P. (S.) hani</i> |
|------------|-------------------|--------------------|-------------------|------------------|-------------------------|-------------------|---------------------------|------------------------|------------------------|----------------------------|--------------------------|---------------------|
| Ala        | 42.85             | 43.65              | 43.37             | 43.74            | 43.37                   | 41.50             | 45.23                     | 47.12                  | 46.58                  | 47.12                      | 47.93                    | 46.58               |
| Arg        | 15.90             | 15.90              | 15.89             | 15.66            | 15.89                   | 15.90             | 15.89                     | 15.89                  | 15.89                  | 15.89                      | 15.89                    | 15.89               |
| Asn        | 56.59             | 56.05              | 56.03             | 56.70            | 58.73                   | 56.32             | 54.93                     | 53.85                  | 53.58                  | 53.85                      | 53.58                    | 53.85               |
| Asp        | 16.44             | 17.25              | 16.97             | 18.09            | 16.97                   | 16.98             | 17.77                     | 17.50                  | 17.77                  | 17.77                      | 17.77                    | 17.77               |
| Cys        | 10.78             | 10.24              | 10.51             | 10.53            | 9.16                    | 10.78             | 10.77                     | 10.77                  | 11.04                  | 11.04                      | 11.31                    | 10.50               |
| Glu        | 22.64             | 21.83              | 22.36             | 20.52            | 22.09                   | 22.64             | 20.46                     | 20.73                  | 20.19                  | 20.46                      | 20.19                    | 20.19               |
| Gly        | 58.74             | 59.01              | 59.54             | 58.86            | 59.00                   | 57.94             | 58.16                     | 58.16                  | 58.70                  | 58.43                      | 58.97                    | 58.43               |
| His        | 19.67             | 20.75              | 20.47             | 20.52            | 19.94                   | 19.94             | 20.46                     | 20.46                  | 20.46                  | 20.46                      | 20.46                    | 20.46               |
| Ile        | 103.48            | 100.51             | 101.56            | 102.32           | 101.56                  | 106.17            | 98.55                     | 99.89                  | 95.58                  | 93.97                      | 94.24                    | 96.93               |
| Leu1       | 148.48            | 150.63             | 150.32            | 144.71           | 150.05                  | 151.71            | 147.82                    | 152.40                 | 142.16                 | 143.24                     | 142.16                   | 147.82              |
| Leu2       | 15.63             | 14.82              | 14.55             | 20.52            | 14.82                   | 12.13             | 17.77                     | 14.27                  | 24.77                  | 22.89                      | 25.31                    | 20.19               |
| Lys        | 23.17             | 23.17              | 24.78             | 23.76            | 23.98                   | 25.33             | 24.77                     | 24.23                  | 23.69                  | 24.23                      | 23.96                    | 23.96               |
| Met        | 59.28             | 61.71              | 59.27             | 60.48            | 60.88                   | 61.17             | 62.47                     | 58.97                  | 56.27                  | 56.54                      | 55.74                    | 56.54               |
| Phe        | 94.04             | 89.73              | 92.13             | 91.52            | 90.79                   | 93.24             | 88.58                     | 89.39                  | 89.12                  | 89.12                      | 89.12                    | 89.93               |
| Pro        | 34.76             | 35.30              | 35.02             | 35.37            | 35.02                   | 34.76             | 34.73                     | 35.00                  | 35.27                  | 35.27                      | 35.27                    | 35.27               |
| Ser1       | 64.40             | 64.13              | 61.69             | 63.71            | 64.92                   | 64.13             | 60.85                     | 61.12                  | 62.20                  | 61.93                      | 61.93                    | 62.20               |
| Ser2       | 27.76             | 28.56              | 27.21             | 27.54            | 27.75                   | 25.87             | 30.69                     | 30.43                  | 29.89                  | 28.54                      | 29.62                    | 29.35               |
| Thr        | 46.35             | 48.23              | 46.88             | 45.90            | 46.07                   | 48.23             | 48.20                     | 49.00                  | 50.35                  | 50.08                      | 49.54                    | 49.27               |
| Trp        | 26.95             | 26.41              | 26.40             | 27.00            | 26.94                   | 26.68             | 26.66                     | 26.66                  | 26.93                  | 26.66                      | 26.93                    | 26.66               |
| Tyr        | 47.97             | 45.54              | 46.88             | 46.98            | 46.61                   | 45.27             | 46.58                     | 45.77                  | 46.31                  | 45.77                      | 45.50                    | 46.85               |
| Val        | 45.27             | 47.16              | 49.57             | 46.17            | 46.34                   | 44.73             | 49.81                     | 49.27                  | 53.85                  | 57.35                      | 55.20                    | 51.97               |

**Table S5.** Nucleotide compositions and skewness levels of the *Amiota* and *Phortica* mitogenomes.

| Regions/genes                   | Species                    | Size (bp) | Nucleotides composition (%) |      |      |      | AT-skew | GC-skew |
|---------------------------------|----------------------------|-----------|-----------------------------|------|------|------|---------|---------|
|                                 |                            |           | A                           | T    | G    | C    |         |         |
| Whole mitogenome<br>(J-strands) | <i>A. dentata</i>          | 16,725    | 40.7                        | 39.2 | 8.1  | 12.0 | 0.019   | -0.194  |
|                                 | <i>A. femorata</i>         | 16,499    | 40.0                        | 39.9 | 8.6  | 11.4 | 0.001   | -0.140  |
|                                 | <i>A. nagatai</i>          | 16,571    | 40.2                        | 40.3 | 8.4  | 11.2 | -0.001  | -0.143  |
|                                 | <i>A. setosa</i>           | 16,803    | 40.7                        | 38.8 | 8.1  | 12.4 | 0.024   | -0.210  |
|                                 | <i>A. spinifemorata</i>    | 16,143    | 40.2                        | 39.4 | 8.7  | 11.7 | 0.010   | -0.147  |
|                                 | <i>A. yifengi</i>          | 16,329    | 40.4                        | 39.7 | 8.3  | 11.7 | 0.009   | -0.170  |
|                                 | <i>P. (A.) longipenis</i>  | 16,290    | 40.1                        | 39.4 | 8.4  | 12.1 | 0.009   | -0.180  |
|                                 | <i>P. (A.) tanabei</i>     | 15,933    | 39.9                        | 39.2 | 8.8  | 12.0 | 0.009   | -0.154  |
|                                 | <i>P. (P.) huazhii</i>     | 16,016    | 39.1                        | 38.1 | 9.1  | 13.6 | 0.013   | -0.198  |
|                                 | <i>P. (P.) pseudogigas</i> | 15,990    | 39.1                        | 38.4 | 9.5  | 12.9 | 0.009   | -0.152  |
|                                 | <i>P. (P.) variegata</i>   | 15,958    | 39.3                        | 38.5 | 9.2  | 13.0 | 0.010   | -0.171  |
|                                 | <i>P. (S.) hani</i>        | 15,937    | 39.4                        | 39.0 | 9.1  | 12.5 | 0.005   | -0.157  |
| PCGs                            | <i>A. dentata</i>          | 11,175    | 32.3                        | 44.9 | 12.0 | 10.9 | -0.163  | 0.048   |
|                                 | <i>A. femorata</i>         | 11,175    | 32.8                        | 44.9 | 11.7 | 10.6 | -0.156  | 0.049   |
|                                 | <i>A. nagatai</i>          | 11,178    | 32.9                        | 45.2 | 11.6 | 10.2 | -0.157  | 0.064   |
|                                 | <i>A. setosa</i>           | 11,152    | 32.2                        | 44.6 | 11.9 | 11.3 | -0.161  | 0.026   |
|                                 | <i>A. spinifemorata</i>    | 11,178    | 32.6                        | 44.9 | 11.8 | 10.7 | -0.159  | 0.049   |
|                                 | <i>A. yifengi</i>          | 11,175    | 32.7                        | 45.0 | 11.5 | 10.7 | -0.158  | 0.036   |
|                                 | <i>P. (A.) longipenis</i>  | 11,184    | 32.4                        | 44.9 | 11.9 | 10.8 | -0.162  | 0.048   |
|                                 | <i>P. (A.) tanabei</i>     | 11,184    | 32.3                        | 45.1 | 12.0 | 10.7 | -0.165  | 0.057   |
|                                 | <i>P. (P.) huazhii</i>     | 11,182    | 31.8                        | 43.4 | 12.7 | 12.2 | -0.154  | 0.020   |
|                                 | <i>P. (P.) pseudogigas</i> | 11,182    | 31.7                        | 43.9 | 12.6 | 11.7 | -0.161  | 0.037   |
|                                 | <i>P. (P.) variegata</i>   | 11,182    | 31.7                        | 44.0 | 12.4 | 11.9 | -0.162  | 0.021   |
|                                 | <i>P. (S.) hani</i>        | 11,184    | 32.0                        | 44.6 | 12.1 | 11.3 | -0.164  | 0.034   |
| PCGs (1st codon positions)      | <i>A. dentata</i>          | 3,727     | 31.6                        | 39.5 | 18.5 | 10.4 | -0.111  | 0.280   |
|                                 | <i>A. femorata</i>         | 3,727     | 31.7                        | 38.9 | 18.8 | 10.6 | -0.102  | 0.279   |
|                                 | <i>A. nagatai</i>          | 3,728     | 31.5                        | 39.0 | 19.1 | 10.4 | -0.106  | 0.295   |
|                                 | <i>A. setosa</i>           | 3,720     | 31.6                        | 38.7 | 18.7 | 11.1 | -0.101  | 0.255   |
|                                 | <i>A. spinifemorata</i>    | 3,728     | 31.8                        | 39.1 | 18.7 | 10.4 | -0.103  | 0.285   |
|                                 | <i>A. yifengi</i>          | 3,727     | 32.2                        | 39.4 | 18.3 | 10.1 | -0.101  | 0.289   |
|                                 | <i>P. (A.) longipenis</i>  | 3,730     | 31.8                        | 38.3 | 19.1 | 10.7 | -0.093  | 0.282   |
|                                 | <i>P. (A.) tanabei</i>     | 3,730     | 31.5                        | 38.8 | 19.2 | 10.4 | -0.104  | 0.297   |
|                                 | <i>P. (P.) huazhii</i>     | 3,730     | 30.8                        | 38.0 | 19.7 | 11.5 | -0.105  | 0.263   |
|                                 | <i>P. (P.) pseudogigas</i> | 3,730     | 30.6                        | 38.0 | 20.1 | 11.3 | -0.108  | 0.280   |
|                                 | <i>P. (P.) variegata</i>   | 3,730     | 30.6                        | 37.9 | 19.9 | 11.6 | -0.107  | 0.263   |
|                                 | <i>P. (S.) hani</i>        | 3,730     | 30.9                        | 38.6 | 19.4 | 11.1 | -0.111  | 0.272   |
| PCGs (2nd codon positions)      | <i>A. dentata</i>          | 3,724     | 20.8                        | 46.5 | 14.0 | 18.8 | -0.382  | -0.146  |
|                                 | <i>A. femorata</i>         | 3,724     | 20.6                        | 46.3 | 14.0 | 19.1 | -0.384  | -0.154  |
|                                 | <i>A. nagatai</i>          | 3,725     | 20.9                        | 46.6 | 13.9 | 18.6 | -0.381  | -0.145  |
|                                 | <i>A. setosa</i>           | 3,716     | 20.8                        | 46.4 | 13.9 | 18.8 | -0.381  | -0.150  |
|                                 | <i>A. spinifemorata</i>    | 3,725     | 21.0                        | 46.3 | 13.8 | 18.9 | -0.376  | -0.156  |
|                                 | <i>A. yifengi</i>          | 3,724     | 20.8                        | 46.8 | 13.7 | 18.8 | -0.385  | -0.157  |
|                                 | <i>P. (A.) longipenis</i>  | 3,727     | 20.6                        | 46.4 | 14.2 | 18.8 | -0.385  | -0.139  |
|                                 | <i>P. (A.) tanabei</i>     | 3,727     | 20.4                        | 46.3 | 14.1 | 19.2 | -0.388  | -0.153  |
|                                 | <i>P. (P.) huazhii</i>     | 3,726     | 20.4                        | 46.1 | 14.2 | 19.4 | -0.386  | -0.155  |
|                                 | <i>P. (P.) pseudogigas</i> | 3,726     | 20.4                        | 46.2 | 14.0 | 19.4 | -0.387  | -0.162  |
|                                 | <i>P. (P.) variegata</i>   | 3,726     | 20.3                        | 46.1 | 14.2 | 19.4 | -0.389  | -0.155  |
|                                 | <i>P. (S.) hani</i>        | 3,727     | 20.5                        | 46.2 | 14.0 | 19.3 | -0.385  | -0.159  |
| PCGs (3rd codon positions)      | <i>A. dentata</i>          | 3,724     | 44.5                        | 48.6 | 3.5  | 3.4  | -0.044  | 0.014   |
|                                 | <i>A. femorata</i>         | 3,724     | 45.9                        | 49.5 | 2.4  | 2.2  | -0.038  | 0.043   |
|                                 | <i>A. nagatai</i>          | 3,725     | 46.4                        | 50.1 | 1.8  | 1.6  | -0.038  | 0.059   |
|                                 | <i>A. setosa</i>           | 3,716     | 44.2                        | 48.7 | 3.1  | 4.0  | -0.048  | -0.127  |
|                                 | <i>A. spinifemorata</i>    | 3,725     | 45.0                        | 49.4 | 2.8  | 2.8  | -0.047  | 0.000   |
|                                 | <i>A. yifengi</i>          | 3,724     | 45.3                        | 49.0 | 2.5  | 3.2  | -0.039  | -0.123  |
|                                 | <i>P. (A.) longipenis</i>  | 3,727     | 44.8                        | 49.9 | 2.4  | 3.0  | -0.054  | -0.111  |
|                                 | <i>P. (A.) tanabei</i>     | 3,727     | 44.9                        | 50.1 | 2.5  | 2.5  | -0.055  | 0.000   |
|                                 | <i>P. (P.) huazhii</i>     | 3,726     | 44.2                        | 46.1 | 4.1  | 5.6  | -0.021  | -0.155  |
|                                 | <i>P. (P.) pseudogigas</i> | 3,726     | 44.0                        | 47.6 | 3.9  | 4.5  | -0.039  | -0.071  |
|                                 | <i>P. (P.) variegata</i>   | 3,726     | 44.2                        | 48.0 | 3.1  | 4.7  | -0.041  | -0.205  |
|                                 | <i>P. (S.) hani</i>        | 3,727     | 44.6                        | 49.0 | 2.9  | 3.5  | -0.047  | -0.094  |

|               |                            |       |      |      |      |      |        |        |
|---------------|----------------------------|-------|------|------|------|------|--------|--------|
| tRNAs         | <i>A. dentata</i>          | 1,444 | 38.7 | 39.4 | 12.5 | 9.3  | -0.009 | 0.147  |
|               | <i>A. femorata</i>         | 1,448 | 39.0 | 39.0 | 12.6 | 9.4  | 0.000  | 0.145  |
|               | <i>A. nagatai</i>          | 1,444 | 38.4 | 39.8 | 12.7 | 9.1  | -0.018 | 0.165  |
|               | <i>A. setosa</i>           | 1,449 | 38.7 | 39.9 | 12.2 | 9.2  | -0.015 | 0.140  |
|               | <i>A. spinifemorata</i>    | 1,440 | 38.0 | 39.7 | 13.1 | 9.2  | -0.022 | 0.175  |
|               | <i>A. yifengi</i>          | 1,446 | 38.9 | 39.4 | 12.6 | 9.1  | -0.006 | 0.161  |
|               | <i>P. (A.) longipenis</i>  | 1,440 | 38.8 | 39.3 | 12.2 | 9.7  | -0.006 | 0.114  |
|               | <i>P. (A.) tanabei</i>     | 1,440 | 38.2 | 39.2 | 12.7 | 9.9  | -0.013 | 0.124  |
|               | <i>P. (P.) huazhii</i>     | 1,439 | 38.2 | 38.2 | 13.4 | 10.2 | 0.000  | 0.136  |
|               | <i>P. (P.) pseudogigas</i> | 1,436 | 38.0 | 39.0 | 13.2 | 9.8  | -0.013 | 0.148  |
|               | <i>P. (P.) variegata</i>   | 1,439 | 37.7 | 38.6 | 13.5 | 10.2 | -0.012 | 0.139  |
|               | <i>P. (S.) hani</i>        | 1,434 | 38.4 | 38.9 | 12.8 | 9.8  | -0.006 | 0.133  |
| rRNAs         | <i>A. dentata</i>          | 2,116 | 41.3 | 41.0 | 11.7 | 6.0  | 0.004  | 0.322  |
|               | <i>A. femorata</i>         | 2,111 | 41.2 | 40.8 | 11.6 | 6.4  | 0.005  | 0.289  |
|               | <i>A. nagatai</i>          | 2,119 | 41.0 | 41.2 | 11.8 | 6.1  | -0.002 | 0.318  |
|               | <i>A. setosa</i>           | 2,107 | 40.4 | 41.0 | 12.3 | 6.3  | -0.007 | 0.323  |
|               | <i>A. spinifemorata</i>    | 2,125 | 41.4 | 40.9 | 11.5 | 6.2  | 0.006  | 0.299  |
|               | <i>A. yifengi</i>          | 2,111 | 41.4 | 41.1 | 11.5 | 6.1  | 0.004  | 0.307  |
|               | <i>P. (A.) longipenis</i>  | 2,108 | 40.3 | 42.3 | 11.3 | 6.1  | -0.024 | 0.299  |
|               | <i>P. (A.) tanabei</i>     | 2,102 | 40.9 | 41.4 | 11.4 | 6.3  | -0.006 | 0.288  |
|               | <i>P. (P.) huazhii</i>     | 2,108 | 40.0 | 40.7 | 12.7 | 6.6  | -0.009 | 0.316  |
|               | <i>P. (P.) pseudogigas</i> | 2,109 | 40.0 | 41.0 | 12.3 | 6.7  | -0.012 | 0.295  |
|               | <i>P. (P.) variegata</i>   | 2,108 | 40.1 | 41.1 | 12.2 | 6.6  | -0.012 | 0.298  |
|               | <i>P. (S.) hani</i>        | 2,104 | 40.7 | 40.7 | 12.1 | 6.6  | 0.000  | 0.294  |
| D-loop region | <i>A. dentata</i>          | 1,912 | 51.9 | 41.9 | 1.5  | 4.7  | 0.107  | -0.516 |
|               | <i>A. femorata</i>         | 1,672 | 50.3 | 43.7 | 1.8  | 4.2  | 0.070  | -0.400 |
|               | <i>A. nagatai</i>          | 1,554 | 49.4 | 44.6 | 1.7  | 4.3  | 0.051  | -0.433 |
|               | <i>A. setosa</i>           | 1,995 | 50.2 | 42.8 | 1.7  | 5.4  | 0.080  | -0.521 |
|               | <i>A. spinifemorata</i>    | 1,319 | 51.8 | 42.1 | 2.8  | 3.3  | 0.103  | -0.082 |
|               | <i>A. yifengi</i>          | 1,515 | 50.8 | 43.0 | 2.3  | 3.8  | 0.083  | -0.246 |
|               | <i>P. (A.) longipenis</i>  | 1,355 | 48.7 | 43.5 | 3.0  | 4.7  | 0.056  | -0.221 |
|               | <i>P. (A.) tanabei</i>     | 1,084 | 50.6 | 42.3 | 2.4  | 4.7  | 0.089  | -0.324 |
|               | <i>P. (P.) huazhii</i>     | 1,182 | 47.5 | 43.3 | 3.2  | 6.0  | 0.046  | -0.304 |
|               | <i>P. (P.) pseudogigas</i> | 1,158 | 47.5 | 42.7 | 3.8  | 6.0  | 0.053  | -0.224 |
|               | <i>P. (P.) variegata</i>   | 1,134 | 50.2 | 42.1 | 2.8  | 4.9  | 0.088  | -0.273 |
|               | <i>P. (S.) hani</i>        | 1,118 | 47.9 | 44.1 | 2.9  | 5.2  | 0.041  | -0.284 |



**Table S6.** Nonsynonymous substitutions per nonsynonymous site (Ka), synonymous substitutions per synonymous site (Ks), and Ka/Ks ( $\omega$ ) values (mean  $\pm$  standard deviation, SD) of the 13 PCGs in the *Amiota* and *Phortica* mitogenomes.

| PCG         | <i>Amiota</i>         |                       |                       | <i>Phortica</i>       |                       |                       |
|-------------|-----------------------|-----------------------|-----------------------|-----------------------|-----------------------|-----------------------|
|             | Ka                    | Ks                    | $\omega$              | Ka                    | Ks                    | $\omega$              |
| <i>ND2</i>  | 0.07310 $\pm$ 0.02511 | 0.31484 $\pm$ 0.03813 | 0.22911 $\pm$ 0.05994 | 0.04121 $\pm$ 0.01843 | 0.44908 $\pm$ 0.07819 | 0.09497 $\pm$ 0.04429 |
| <i>COX1</i> | 0.02240 $\pm$ 0.00569 | 0.46136 $\pm$ 0.07231 | 0.04936 $\pm$ 0.01396 | 0.01354 $\pm$ 0.00581 | 0.47929 $\pm$ 0.07440 | 0.02781 $\pm$ 0.01033 |
| <i>COX2</i> | 0.03733 $\pm$ 0.01383 | 0.35690 $\pm$ 0.05723 | 0.10890 $\pm$ 0.05272 | 0.01989 $\pm$ 0.00804 | 0.41700 $\pm$ 0.08408 | 0.04769 $\pm$ 0.01928 |
| <i>ATP8</i> | 0.08515 $\pm$ 0.01683 | 0.27083 $\pm$ 0.09634 | 0.36450 $\pm$ 0.16606 | 0.04191 $\pm$ 0.01528 | 0.25053 $\pm$ 0.09556 | 0.18193 $\pm$ 0.08914 |
| <i>ATP6</i> | 0.04048 $\pm$ 0.01084 | 0.46746 $\pm$ 0.10290 | 0.09053 $\pm$ 0.02977 | 0.02583 $\pm$ 0.01104 | 0.43904 $\pm$ 0.04247 | 0.05854 $\pm$ 0.02380 |
| <i>COX3</i> | 0.03276 $\pm$ 0.01007 | 0.40396 $\pm$ 0.08413 | 0.08493 $\pm$ 0.03326 | 0.01443 $\pm$ 0.00478 | 0.47062 $\pm$ 0.08853 | 0.03112 $\pm$ 0.01149 |
| <i>ND3</i>  | 0.05183 $\pm$ 0.00867 | 0.37636 $\pm$ 0.09204 | 0.14624 $\pm$ 0.04529 | 0.04426 $\pm$ 0.01964 | 0.50563 $\pm$ 0.08984 | 0.08602 $\pm$ 0.03596 |
| <i>ND5</i>  | 0.05822 $\pm$ 0.01502 | 0.35825 $\pm$ 0.03984 | 0.16226 $\pm$ 0.03723 | 0.03616 $\pm$ 0.01356 | 0.42760 $\pm$ 0.04295 | 0.08462 $\pm$ 0.03043 |
| <i>ND4</i>  | 0.06171 $\pm$ 0.01725 | 0.34988 $\pm$ 0.03464 | 0.17897 $\pm$ 0.05528 | 0.03612 $\pm$ 0.01563 | 0.43492 $\pm$ 0.05970 | 0.08151 $\pm$ 0.03088 |
| <i>ND4L</i> | 0.03065 $\pm$ 0.01447 | 0.24184 $\pm$ 0.06298 | 0.13640 $\pm$ 0.07431 | 0.01354 $\pm$ 0.00661 | 0.39400 $\pm$ 0.06108 | 0.03534 $\pm$ 0.01869 |
| <i>ND6</i>  | 0.07784 $\pm$ 0.02091 | 0.32163 $\pm$ 0.04968 | 0.24282 $\pm$ 0.05819 | 0.05730 $\pm$ 0.02188 | 0.47782 $\pm$ 0.08720 | 0.12112 $\pm$ 0.04654 |
| <i>CYTb</i> | 0.03774 $\pm$ 0.00735 | 0.38616 $\pm$ 0.08462 | 0.10049 $\pm$ 0.02328 | 0.02564 $\pm$ 0.00831 | 0.56119 $\pm$ 0.08176 | 0.04574 $\pm$ 0.01396 |
| <i>ND1</i>  | 0.03304 $\pm$ 0.00579 | 0.35991 $\pm$ 0.05560 | 0.09392 $\pm$ 0.02120 | 0.01493 $\pm$ 0.00685 | 0.38131 $\pm$ 0.04933 | 0.03908 $\pm$ 0.01728 |

**Table S7.** Partitioning schemes and data subsets evaluated for the Bayesian inference (BI) and Maximum likelihood (ML) analysis by PartitionFinder. For the data set based on the nucleotides of the 13 PCGs and two rRNAs, best-fit selected substitution models for the PCGs (by codon positions) and rRNAs (by genes) are shown; for the data set of the amino acids based on the 13 PCGs, best-fit selected substitution models for the PCGs (by genes) are shown.

| Subset | 13 PCGs + two rRNAs (nucleotides)                                  |            | 13 PCGs (amino acids)                 |                     |
|--------|--------------------------------------------------------------------|------------|---------------------------------------|---------------------|
|        | Partitioning scheme                                                | Best model | Partitioning scheme                   | Partitioning scheme |
| 1      | <i>ATP8</i> 1st, <i>ND2</i> 1st, <i>ND6</i> 1st, <i>ND3</i> 1st    | TIM+G      | <i>ATP8</i> , <i>ND2</i>              | MTART+G+F           |
| 2      | <i>ATP8</i> 2nd, <i>ND2</i> 2nd                                    | TRN+G      | <i>COX1</i> , <i>COX3</i>             | MTMAM+I+G+F         |
| 3      | <i>COX1</i> 3rd, <i>ND2</i> 3rd                                    | TIM+G      | <i>COX2</i> , <i>CYTB</i>             | MTMAM+I+G+F         |
| 4      | <i>COX1</i> 1st                                                    | TRN+I+G    | <i>ATP6</i> , <i>ND1</i>              | MTART+I+G           |
| 5      | <i>COX1</i> 2nd                                                    | F81+I+G    | <i>ND6</i> , <i>ND3</i>               | MTMAM+G+F           |
| 6      | <i>COX3</i> 1st, <i>ATP6</i> 1st, <i>COX2</i> 1st, <i>CYTB</i> 1st | GTR+G      | <i>ND4L</i> , <i>ND5</i> , <i>ND4</i> | MTART+I+G+F         |
| 7      | <i>COX2</i> 2nd                                                    | F81+G      |                                       |                     |
| 8      | <i>COX2</i> 3rd, <i>COX3</i> 3rd, <i>CYTB</i> 3rd                  | TIM+G      |                                       |                     |
| 9      | <i>ATP8</i> 3rd, <i>ND6</i> 3rd, <i>ND3</i> 3rd                    | TRN+G      |                                       |                     |
| 10     | <i>ND1</i> 2nd, <i>ATP6</i> 2nd, <i>CYTB</i> 2nd                   | TVM+I+G    |                                       |                     |
| 11     | <i>ATP6</i> 3rd                                                    | TRN+G      |                                       |                     |
| 12     | <i>COX3</i> 2nd                                                    | TVM+G      |                                       |                     |
| 13     | <i>ND3</i> 2nd, <i>ND6</i> 2nd                                     | GTR+G      |                                       |                     |
| 14     | <i>ND4</i> 1st, <i>ND5</i> 1st                                     | GTR+I+G    |                                       |                     |
| 15     | <i>ND4</i> 2nd, <i>ND5</i> 2nd                                     | GTR+I+G    |                                       |                     |
| 16     | <i>ND5</i> 3rd, <i>ND4</i> 3rd                                     | TIM+I+G    |                                       |                     |
| 17     | <i>ND4L</i> 1st, <i>ND1</i> 1st                                    | TIM+G      |                                       |                     |
| 18     | <i>ND4L</i> 2nd                                                    | TRN        |                                       |                     |
| 19     | <i>ND1</i> 3rd, <i>ND4L</i> 3rd                                    | K81UF+G    |                                       |                     |
| 20     | srRNA, lrRNA                                                       | GTR+I+G    |                                       |                     |
